# Supplementary material for: Boanmycin overcomes bortezomib resistance by inducing DNA damage and endoplasmic reticulum functional impairment in multiple myeloma
Source: PubMed Central journal article supplement — Biol Direct. 2025 Jan 6;20:1. doi: 10.1186/s13062-024-00590-y (PMC11702215; doi:10.1186/s13062-024-00590-y), 2025-01-06
Supplement: 13062_2024_590_MOESM1_ESM.pdf [file 13062_2024_590_MOESM1_ESM.pdf]

**A****Supplementary table 1. The IC<sub>50</sub> values of boanmycin in three MM cells**

| Cells     | IC <sub>50</sub> (μg/mL) |
|-----------|--------------------------|
| RPMI 8226 | 17.49                    |
| U266      | 29.05                    |
| MM1S      | 13.89                    |

**B**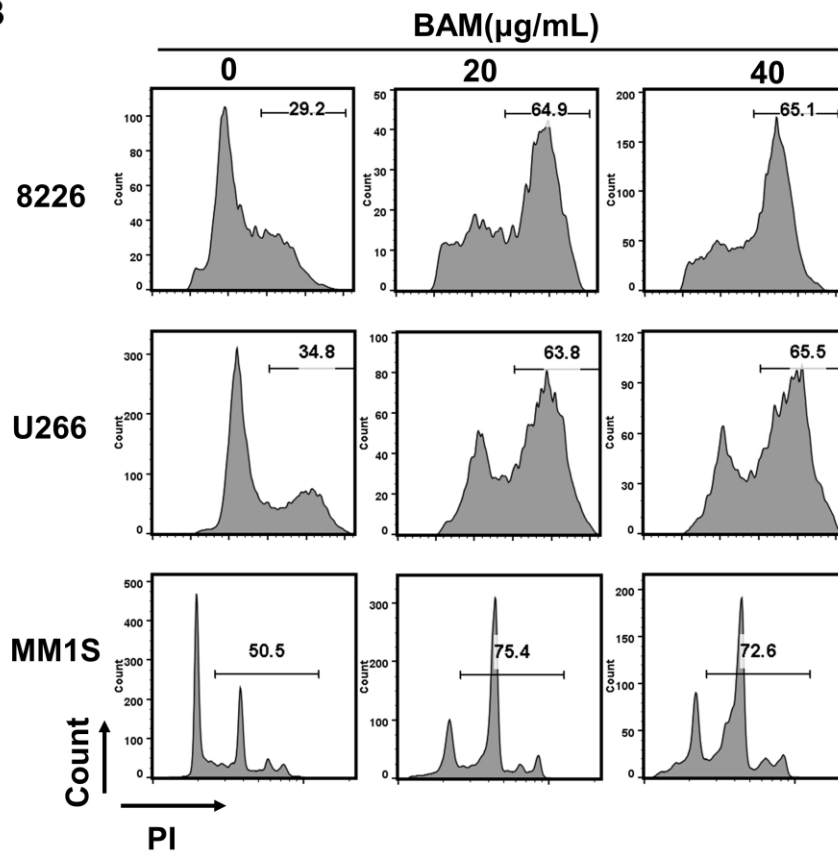**Supplementary Figure 1.** The IC<sub>50</sub> values of boanmycin on three MM cell lines and cell cycle analysis.

(A) The IC<sub>50</sub> values of boanmycin on three MM cell lines. (B) The cell cycle was analyzed by flow cytometry after treating MM cells with indicated concentrations of boanmycin for 48 h.

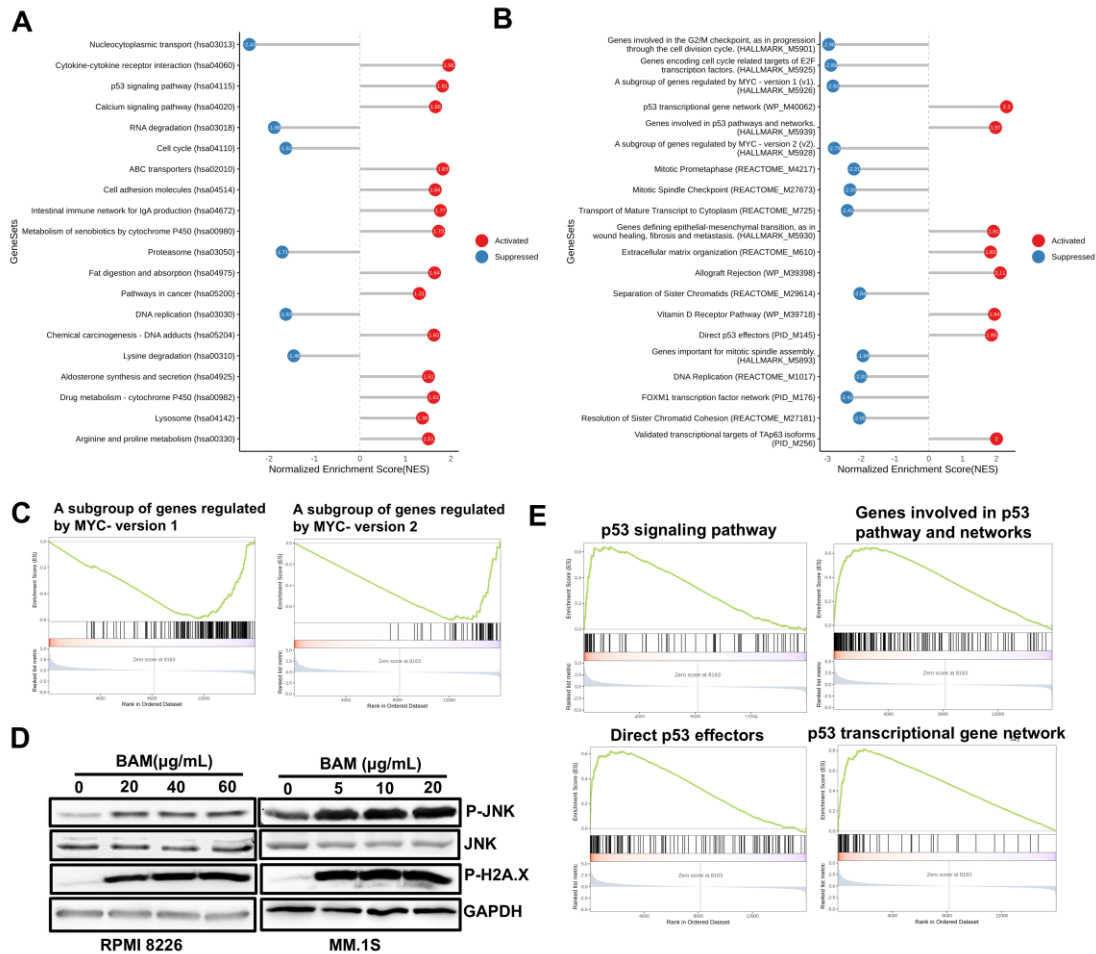

**Supplementary Figure 2.** Bioinformatics analysis of boanmycin-induced signaling pathway changes in multiple myeloma cells.

(A) A GSEA lollipop map showing the activated and suppressed signaling pathways was presented (based on the KEGG database). (B) A GSEA lollipop map showing the activated and suppressed signaling pathways was presented (based on the HALL marker database). (C) GSEA revealed the suppression of the MYC signal after treatment with boanmycin. (D) Western blot analysis of p-JNK, JNK, and  $\gamma$ -H2AX after treating MM cells with indicated concentrations of boanmycin for 48 h. GAPDH was used as a control. (E) The GSEA results demonstrated the upregulation of the P53 signaling pathway.

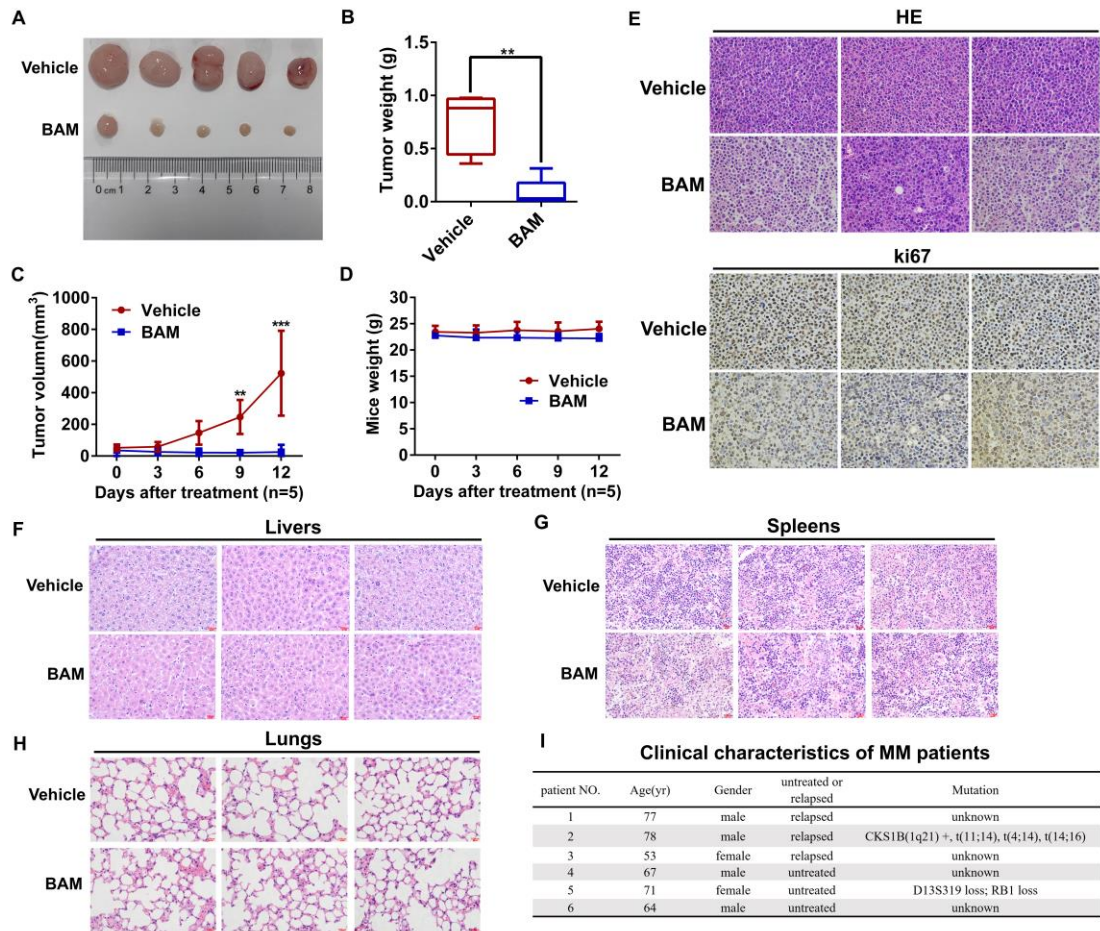

**Supplementary Figure 3.** Boanmycin inhibits the growth of multiple myeloma cells in mouse xenograft models and clinical characteristics of MM patients.

(A) NOD-SCID mice bearing MM.1S xenografts were treated with vehicle (PBS) or 10 mg/kg boanmycin every three days for 12 days. Photographs of tumors separated from animals are presented (n=5 mice per group). (B) The tumor weights of sacrificed animals were analyzed and plotted (n=5 mice per group). (C) The tumor volume was monitored and plotted over the indicated time (n=5 mice per group). (D) Body weight change was plotted versus time (n=5 mice per group). (E) Hematoxylin and eosin (HE) staining and Ki-67 immunohistochemical staining of the xenografts were performed (n=3 mice per group). (F) HE staining of liver tissues from the vehicle and boanmycin-treated groups (n=3 mice per group). (G) HE staining of spleen tissues from the vehicle and boanmycin-treated groups (n=3 mice per group). (H) HE staining of lung tissues from the vehicle and boanmycin-treated groups (n=3 mice per group). (I) Clinical characteristics of MM patients. (\*\*p < 0.01, \*\*\*p < 0.001 vs.

vehicle).
