# Supplementary material for: Boanmycin overcomes bortezomib resistance by inducing DNA damage and endoplasmic reticulum functional impairment in multiple myeloma
Source: PubMed Central journal article supplement — Biol Direct. 2025 Jan 6;20:1. doi: 10.1186/s13062-024-00590-y (PMC11702215; doi:10.1186/s13062-024-00590-y), 2025-01-06
Supplement: 13062_2024_590_MOESM2_ESM.pdf [file 13062_2024_590_MOESM2_ESM.pdf]

**Figure 1G**

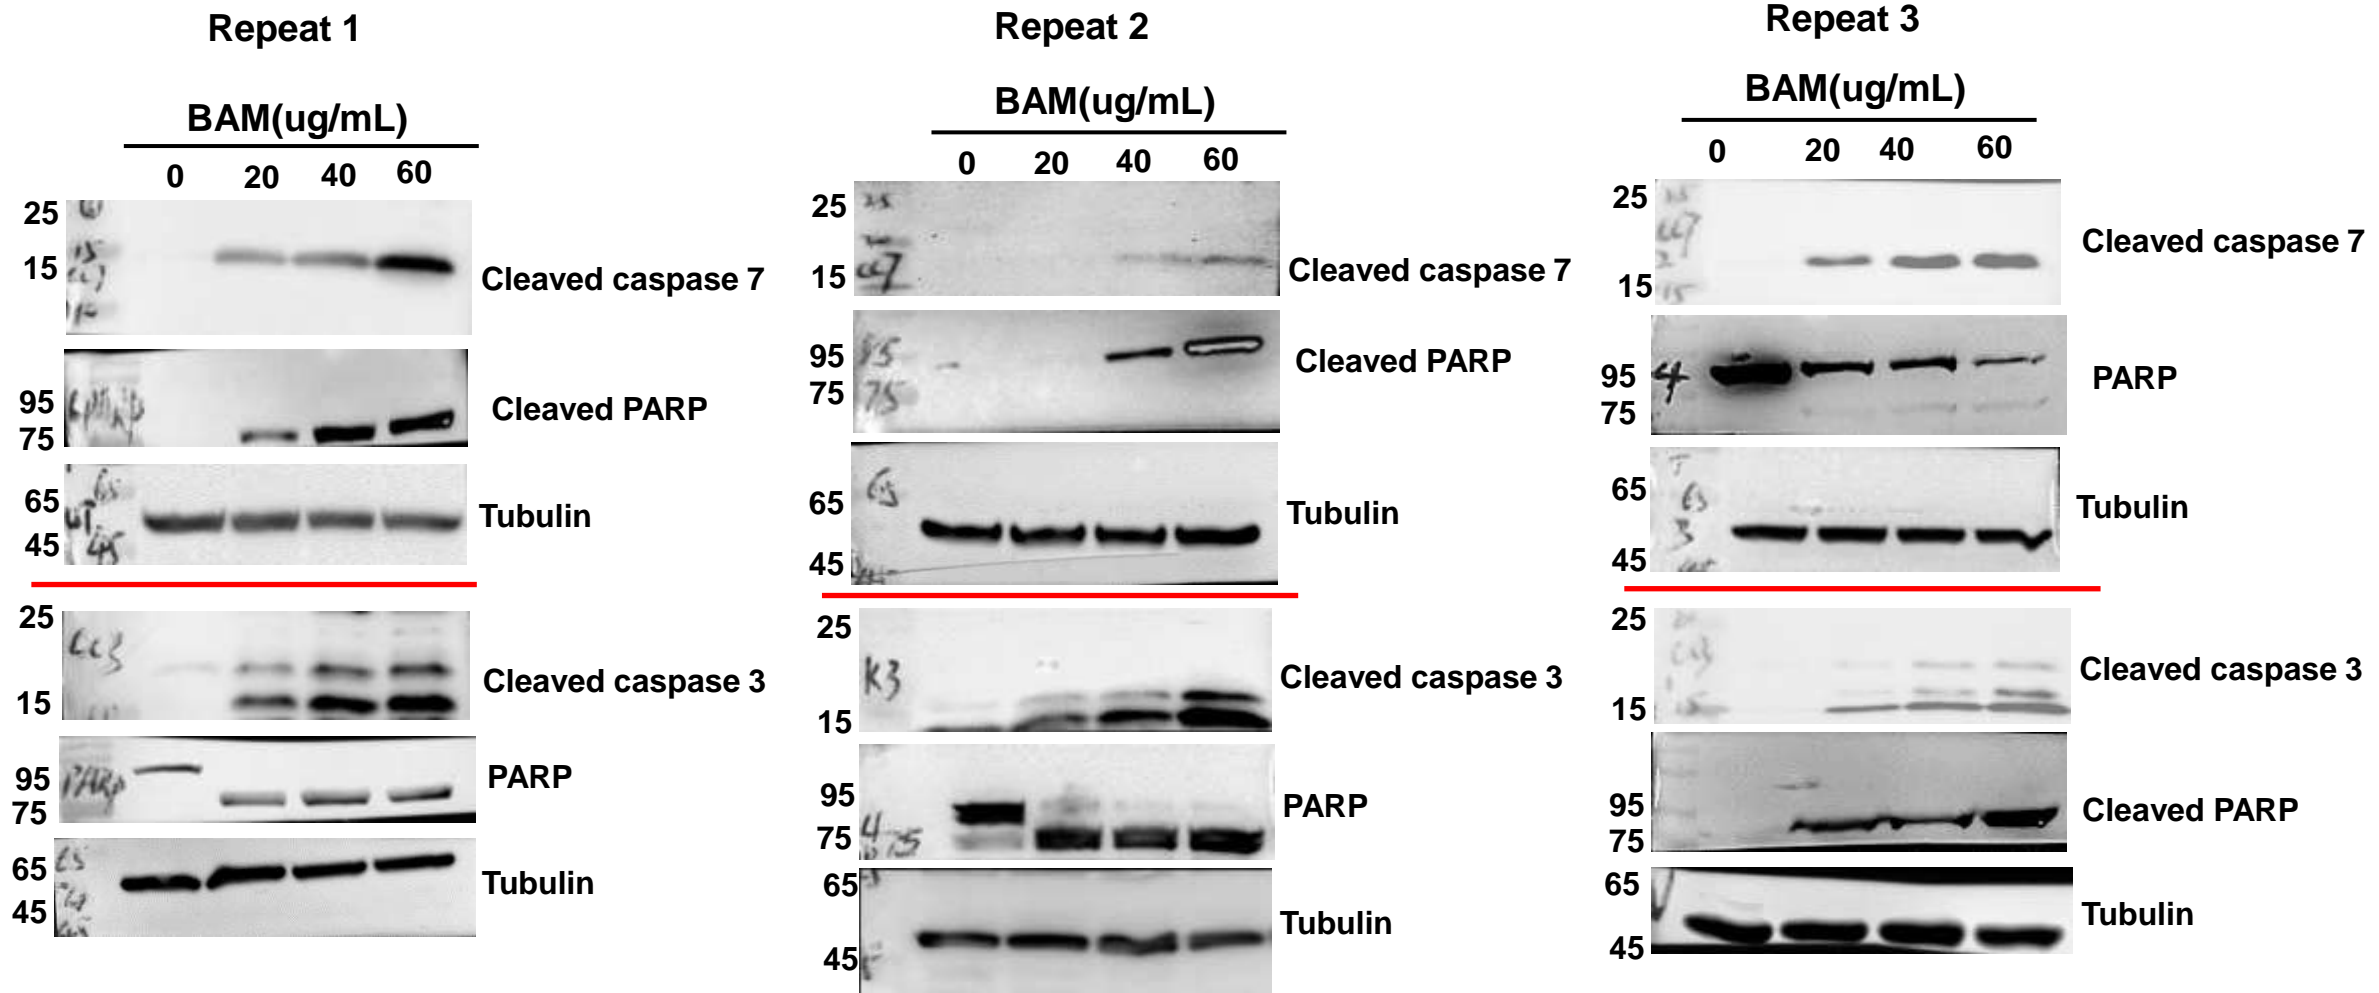

Western blot analysis of PARP, cleaved PARP, cleaved caspase 3, and cleaved caspase 7 after treating U266B1 cells with boanmycin for 48 hours.

Note: Images above the red line were derived from one gel, images below the red line were derived from another gel.

**Figure 1G**

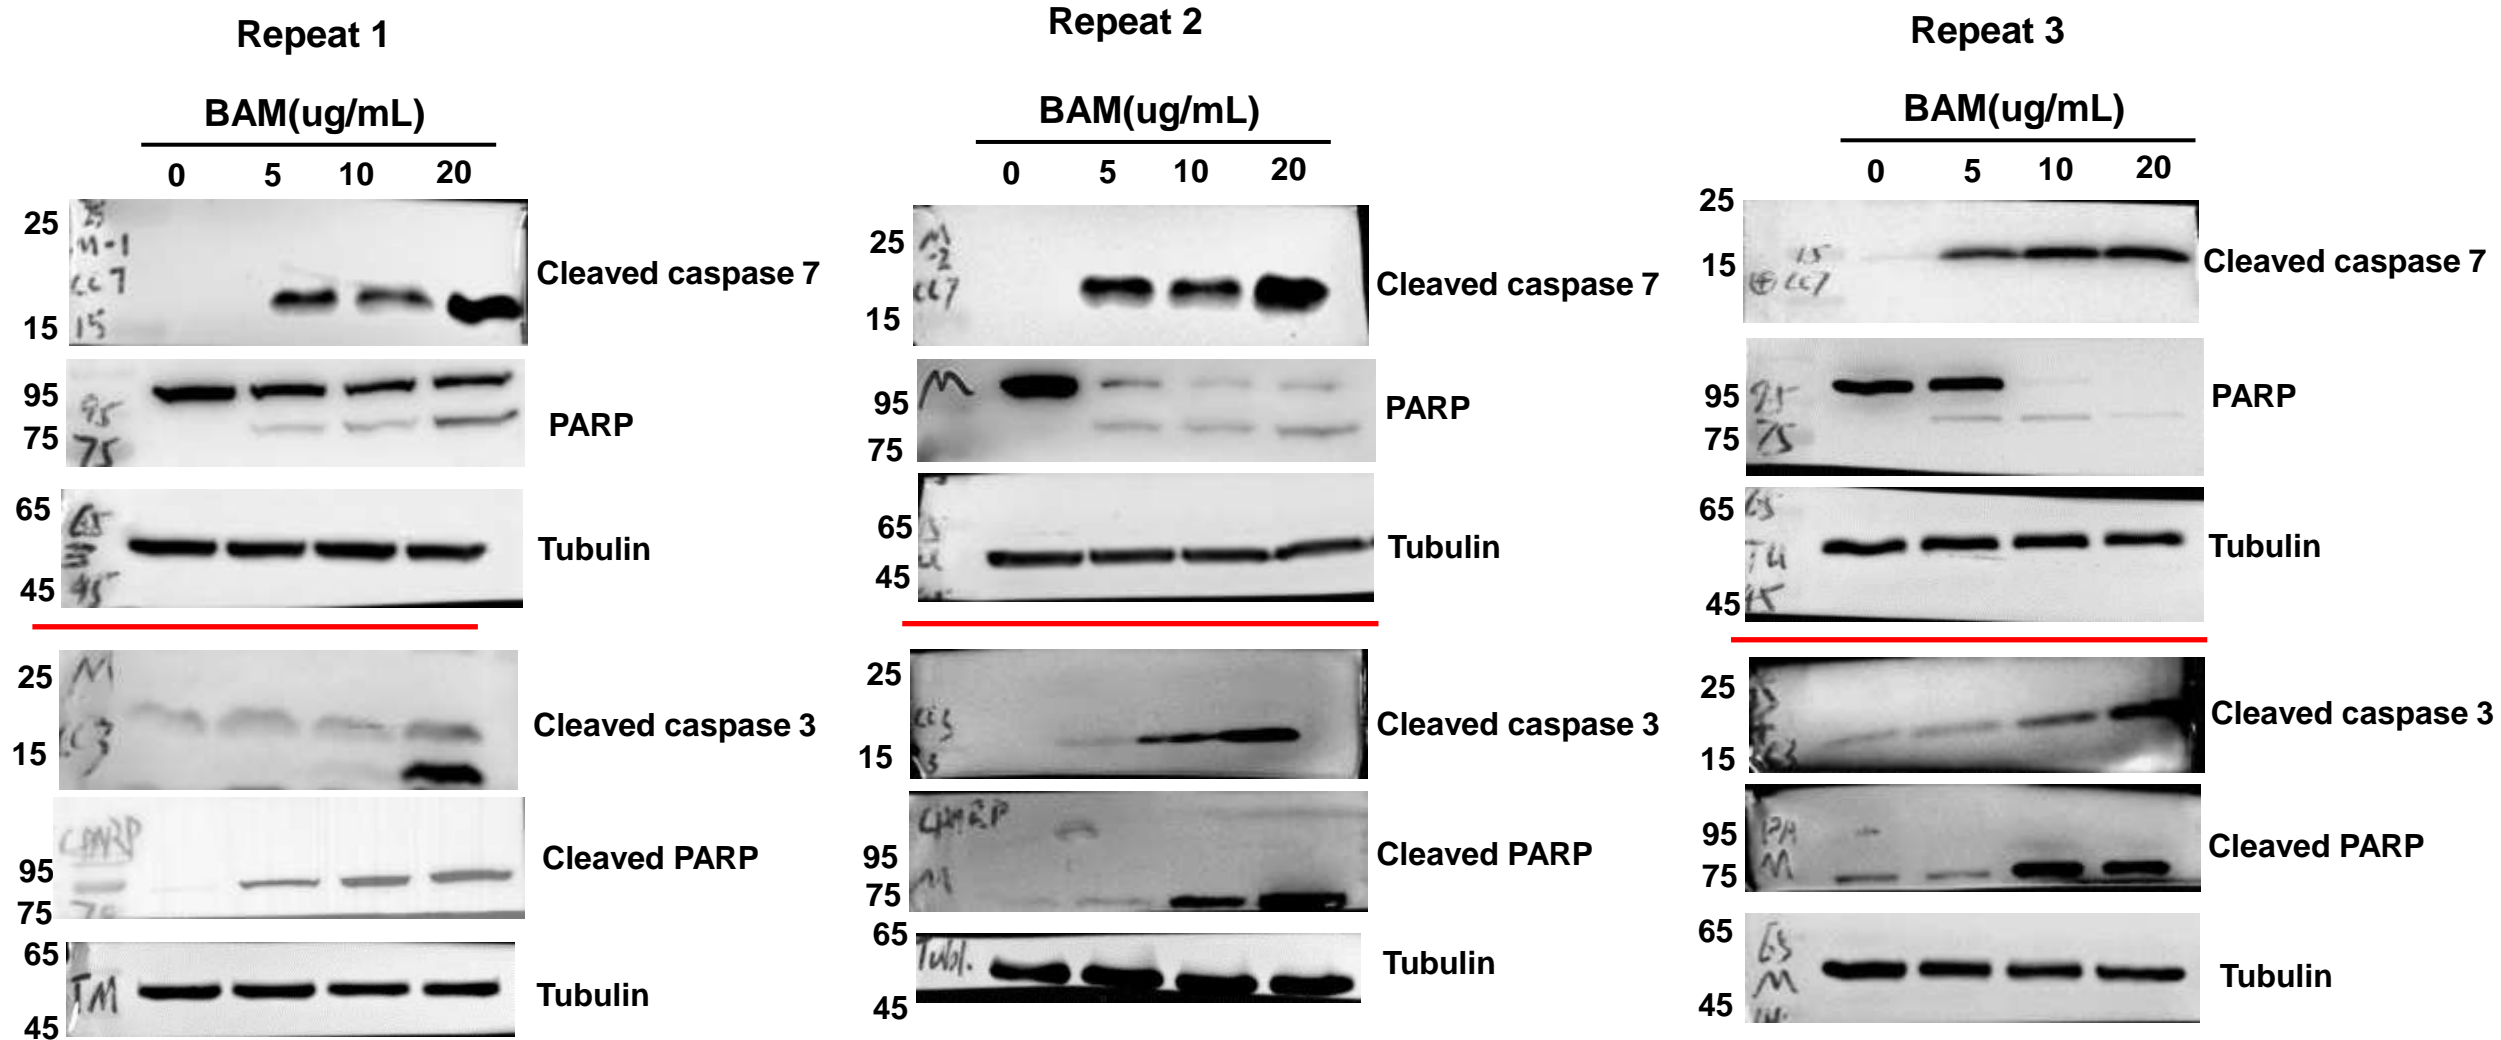

Western blot analysis of PARP, cleaved PARP, cleaved caspase 3, and cleaved caspase 7 after treating MM.1S cells with boanmycin for 48 hours.

Note: Images above the red line were derived from one gel, images below the red line were derived from another gel.

Figure 2C

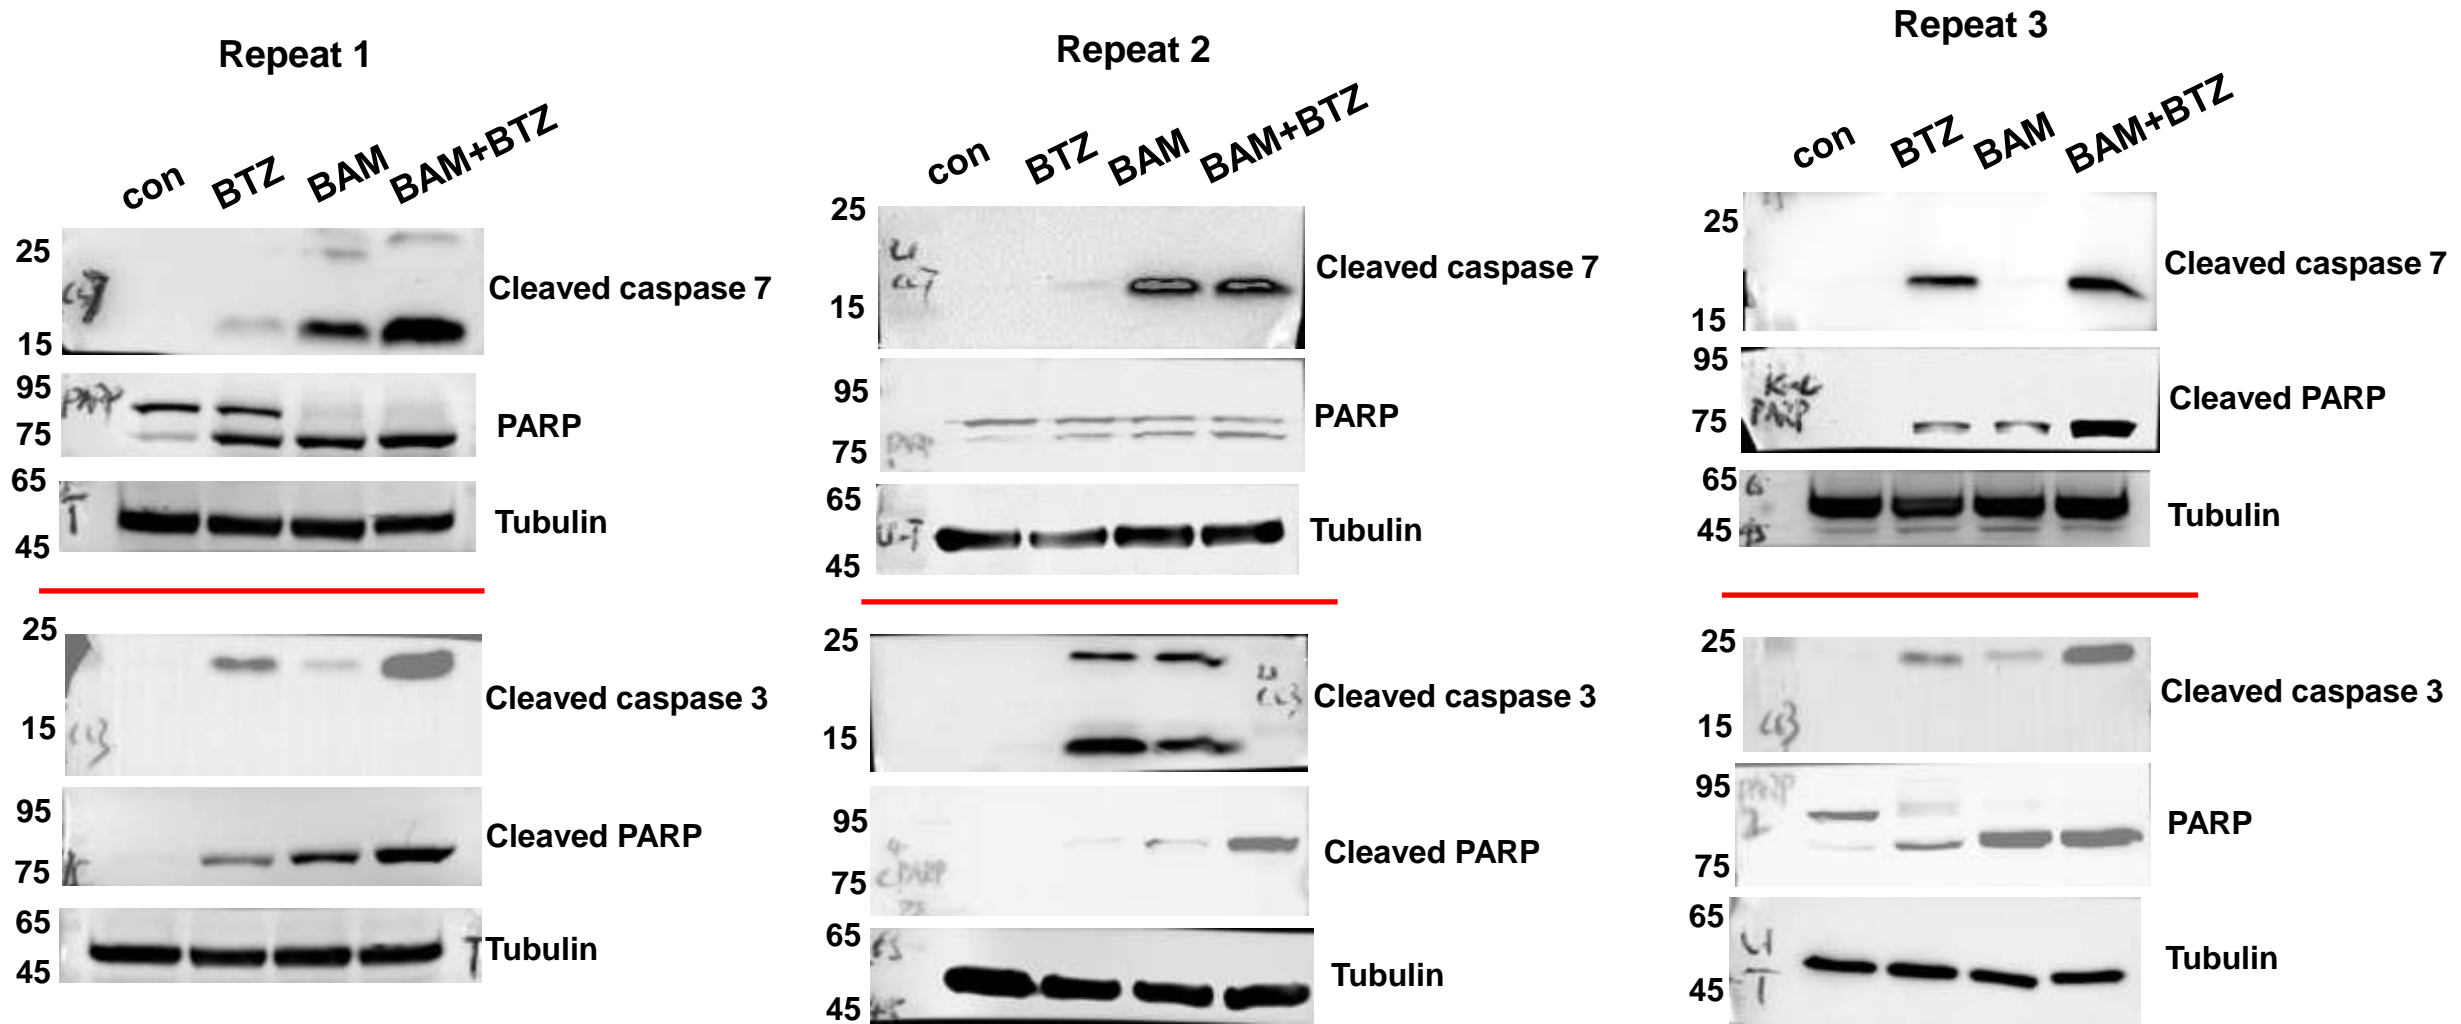

Western blot analysis of PARP, cleaved PARP, cleaved caspase 3, and cleaved caspase 7 after treating U266B1 cells with bortezomib, boanmycin or the combination of two drugs for 48 hours.

Note: Images above the red line were derived from one gel, images below the red line were derived from another gel.

**Figure 2C**

Repeat 1

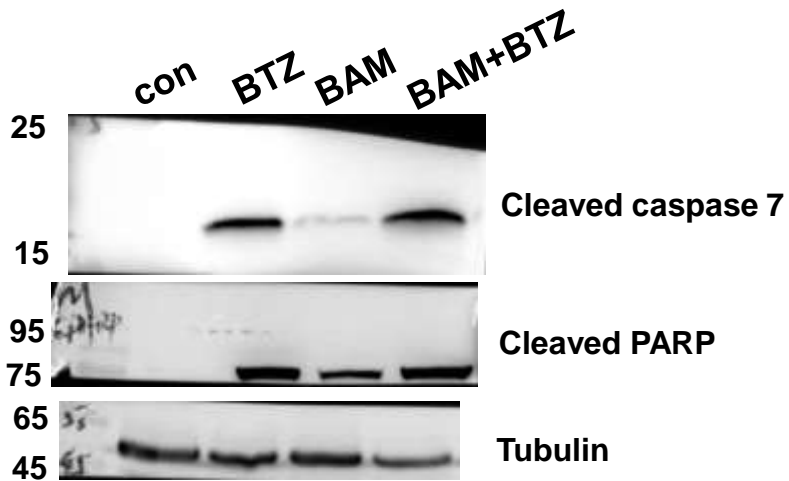

Repeat 2

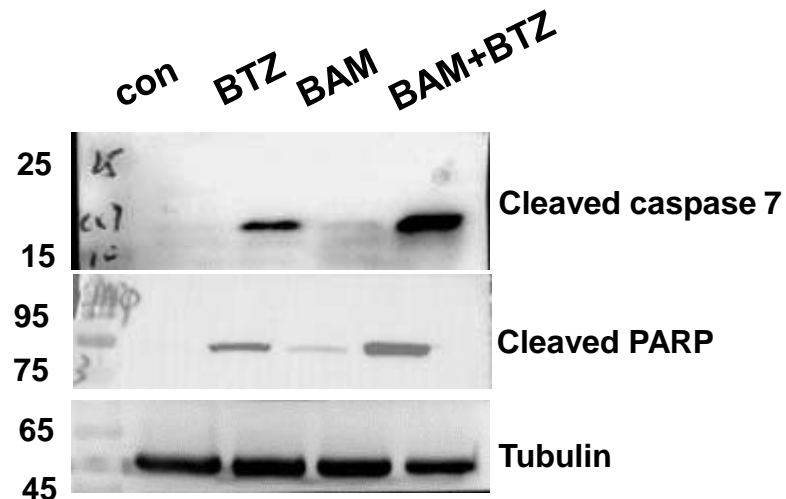

Repeat 3

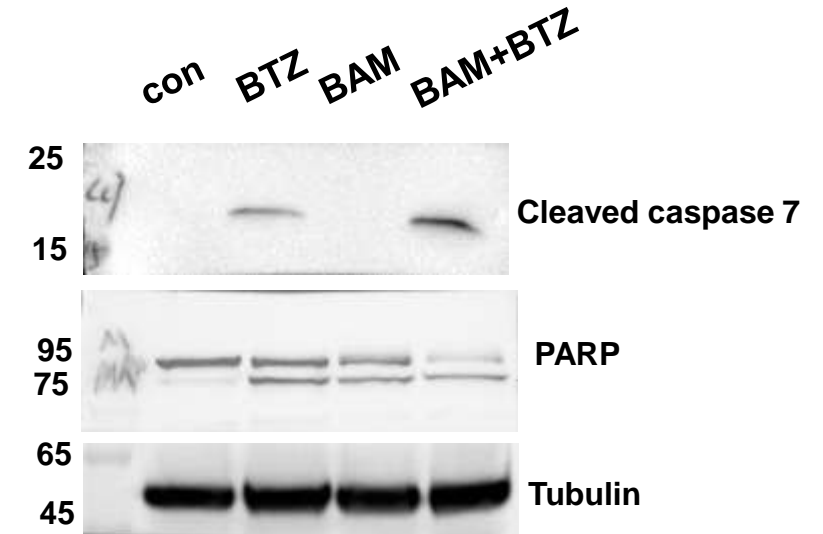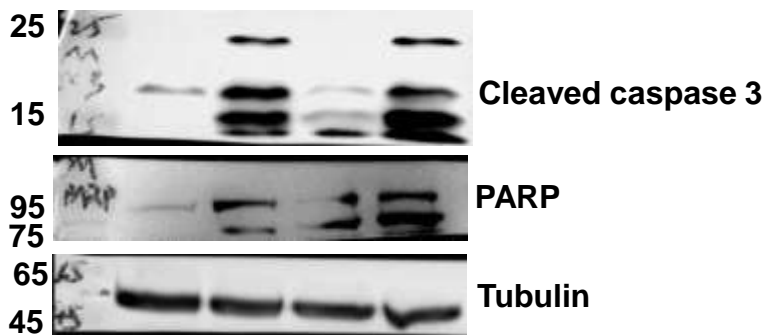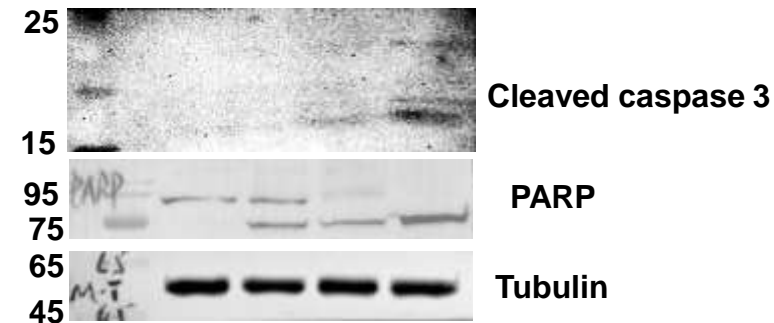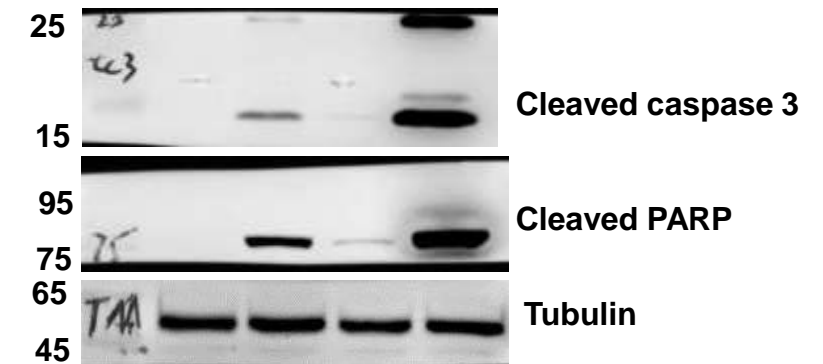

Western blot analysis of PARP, cleaved PARP, cleaved caspase 3, and cleaved caspase 7 after treating MM.1S cells with bortezomib, boanmycin or the combination of two drugs for 48 hours.

**Note:** Images above the red line were derived from one gel, images below the red line were derived from another gel.

**Figure 3E**

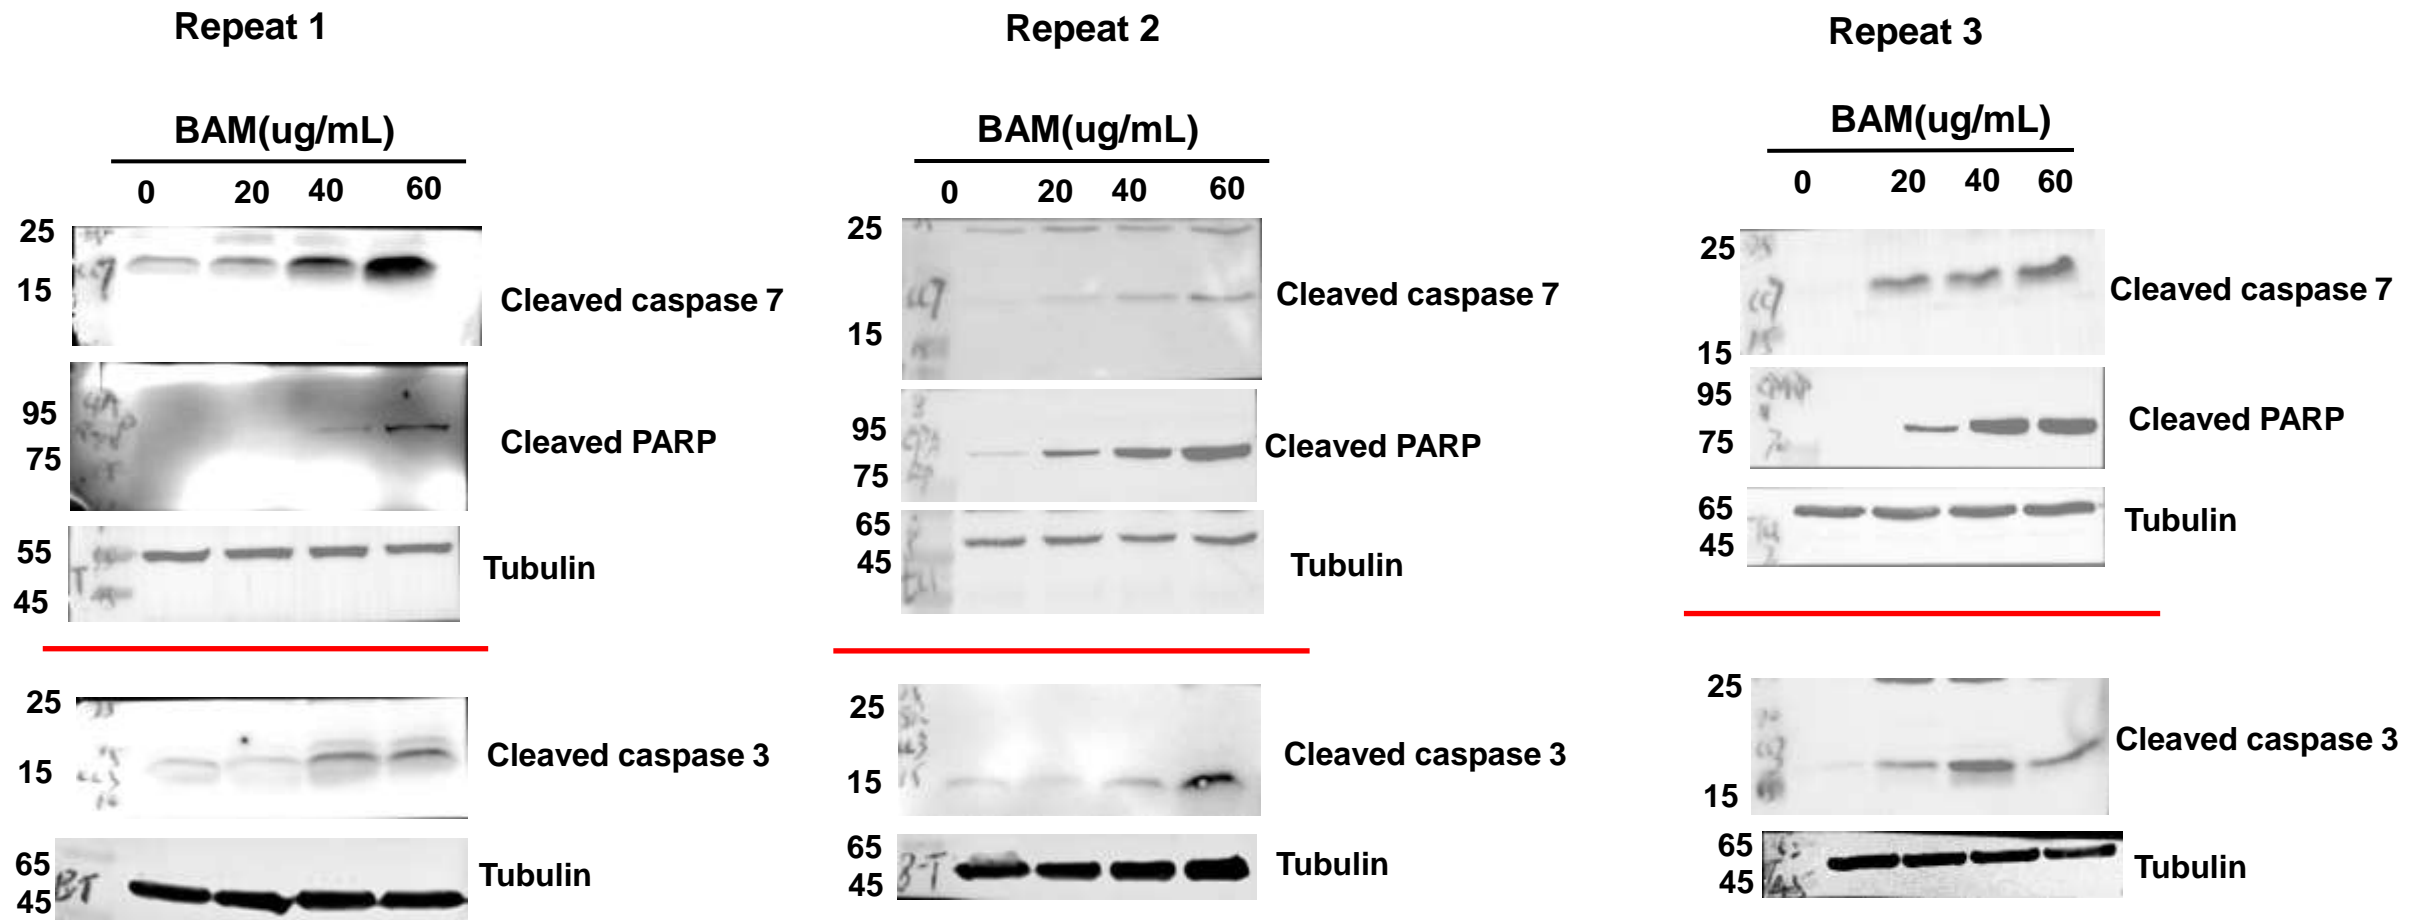

Western blot analysis of cleaved PARP, cleaved caspase 3, and cleaved caspase 7 after treating RPMI 8226-Res cells with boanmycin for 48 hours.

Note: Images above the red line were derived from one gel, images below the red line were derived from another gel.

**Figure 3E**

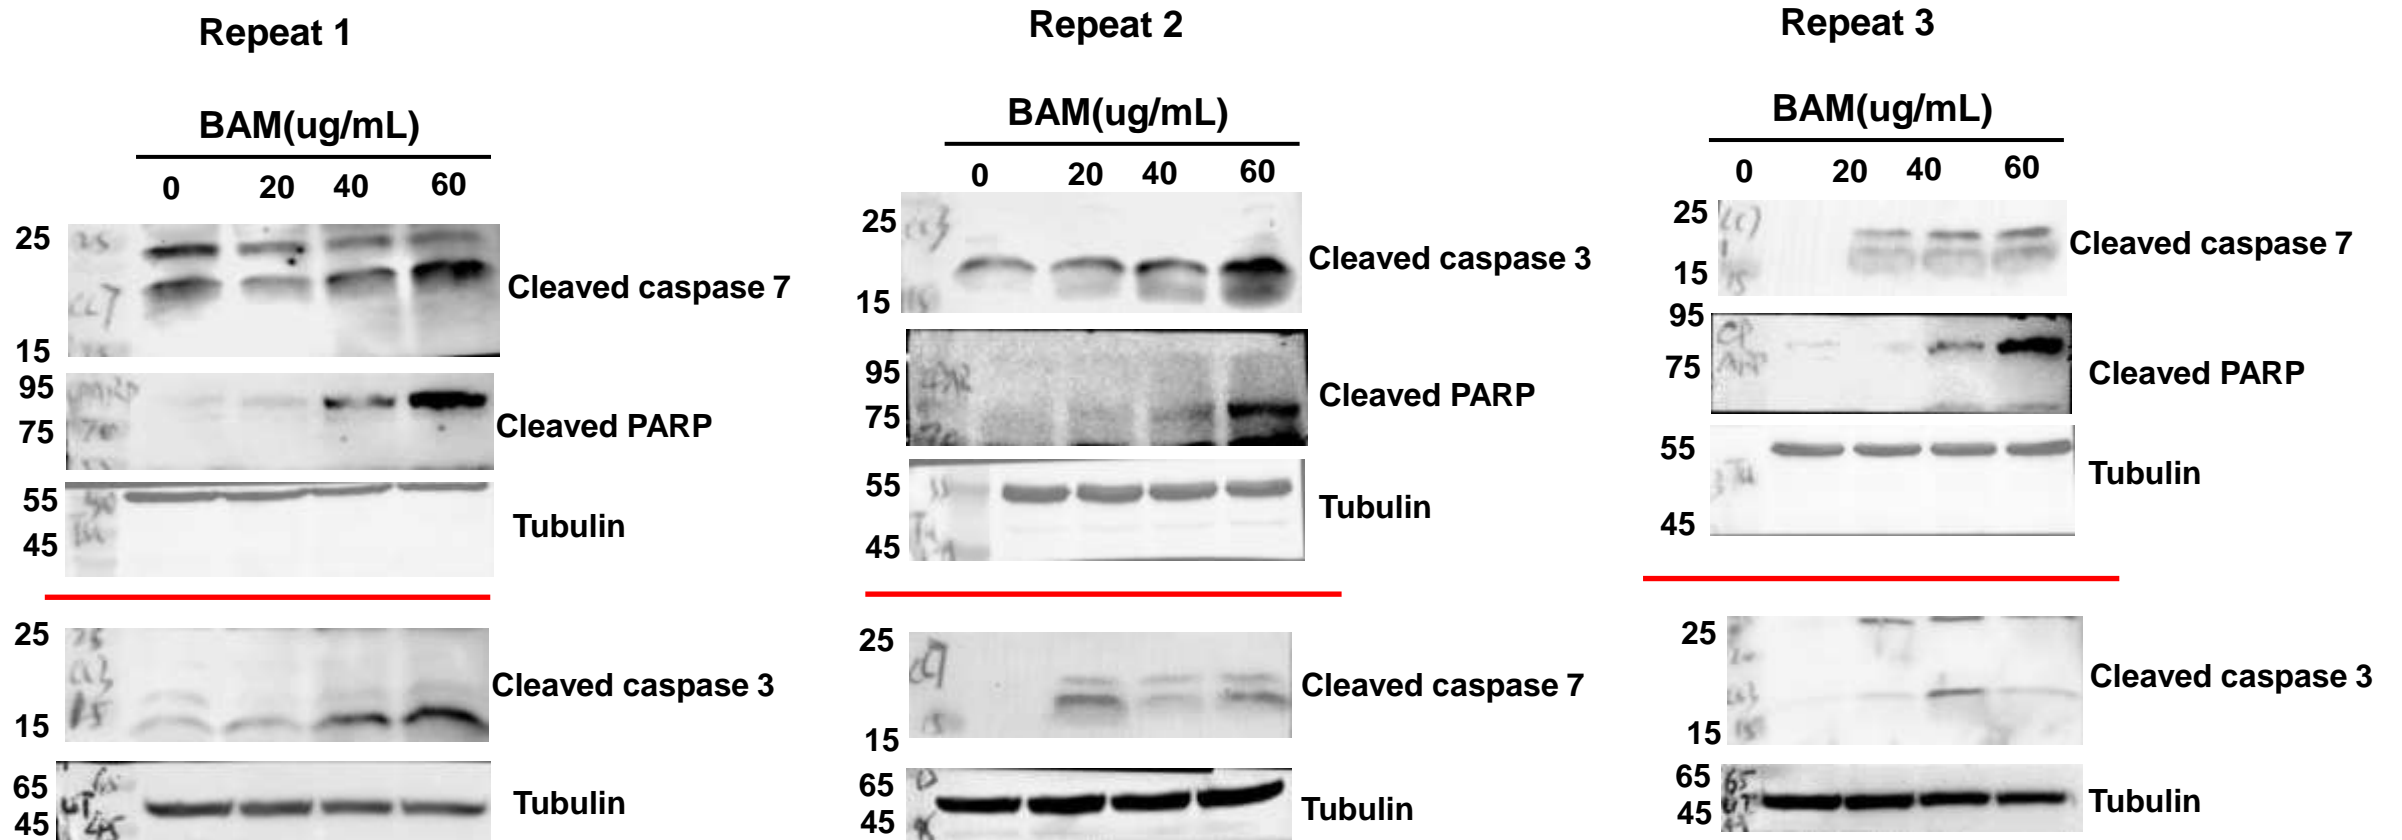

Western blot analysis of cleaved PARP, cleaved caspase 3, and cleaved caspase 7 after treating U266B1-Res cells with boanmycin for 48 hours.

Note: Images above the red line were derived from one gel, images below the red line were derived from another gel.



## Supplementary Figure 2D

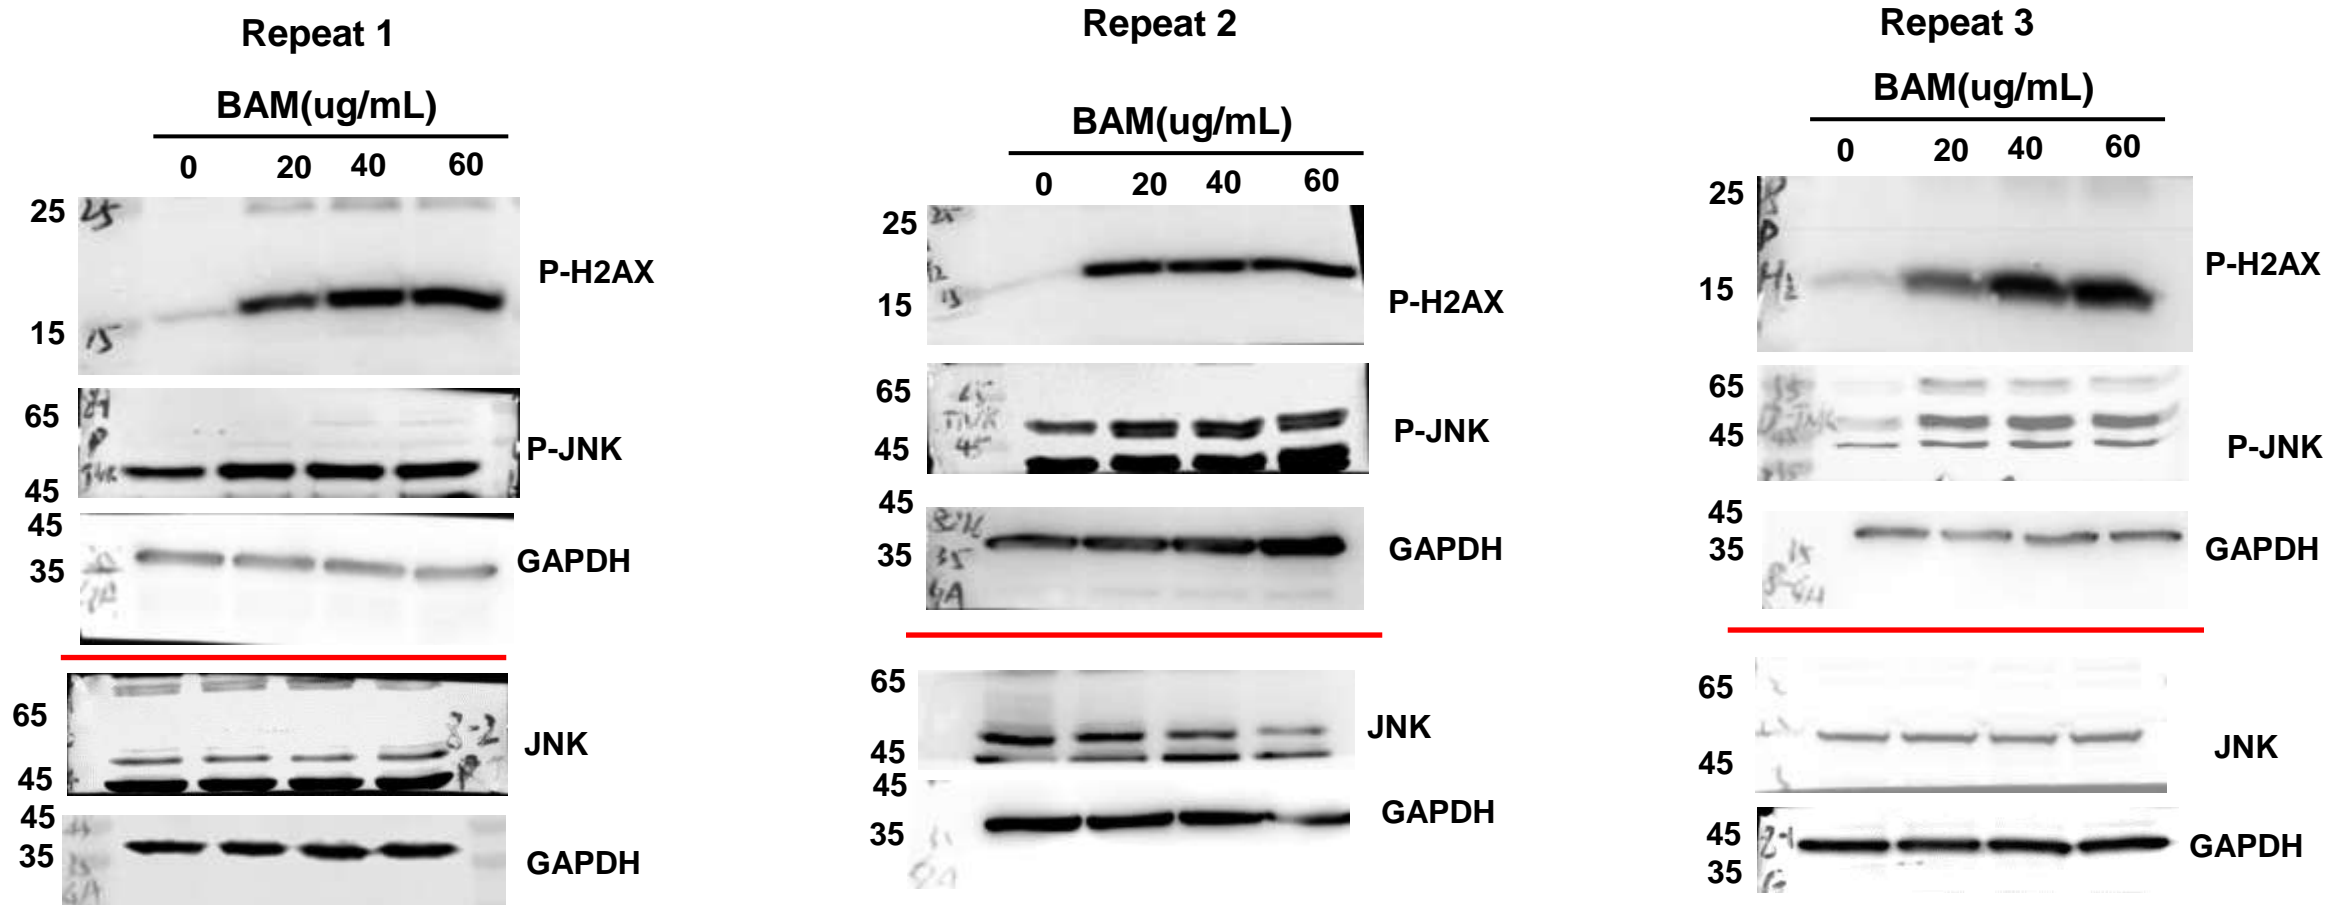

Western blot of P-H2AX, JNK and p-JNK after treating RPMI 8226 cells with boanmycin for 48 hours.

Note: Images above the red line were derived from one gel, images below the red line were derived from another gel.

## Supplementary Figure 2D

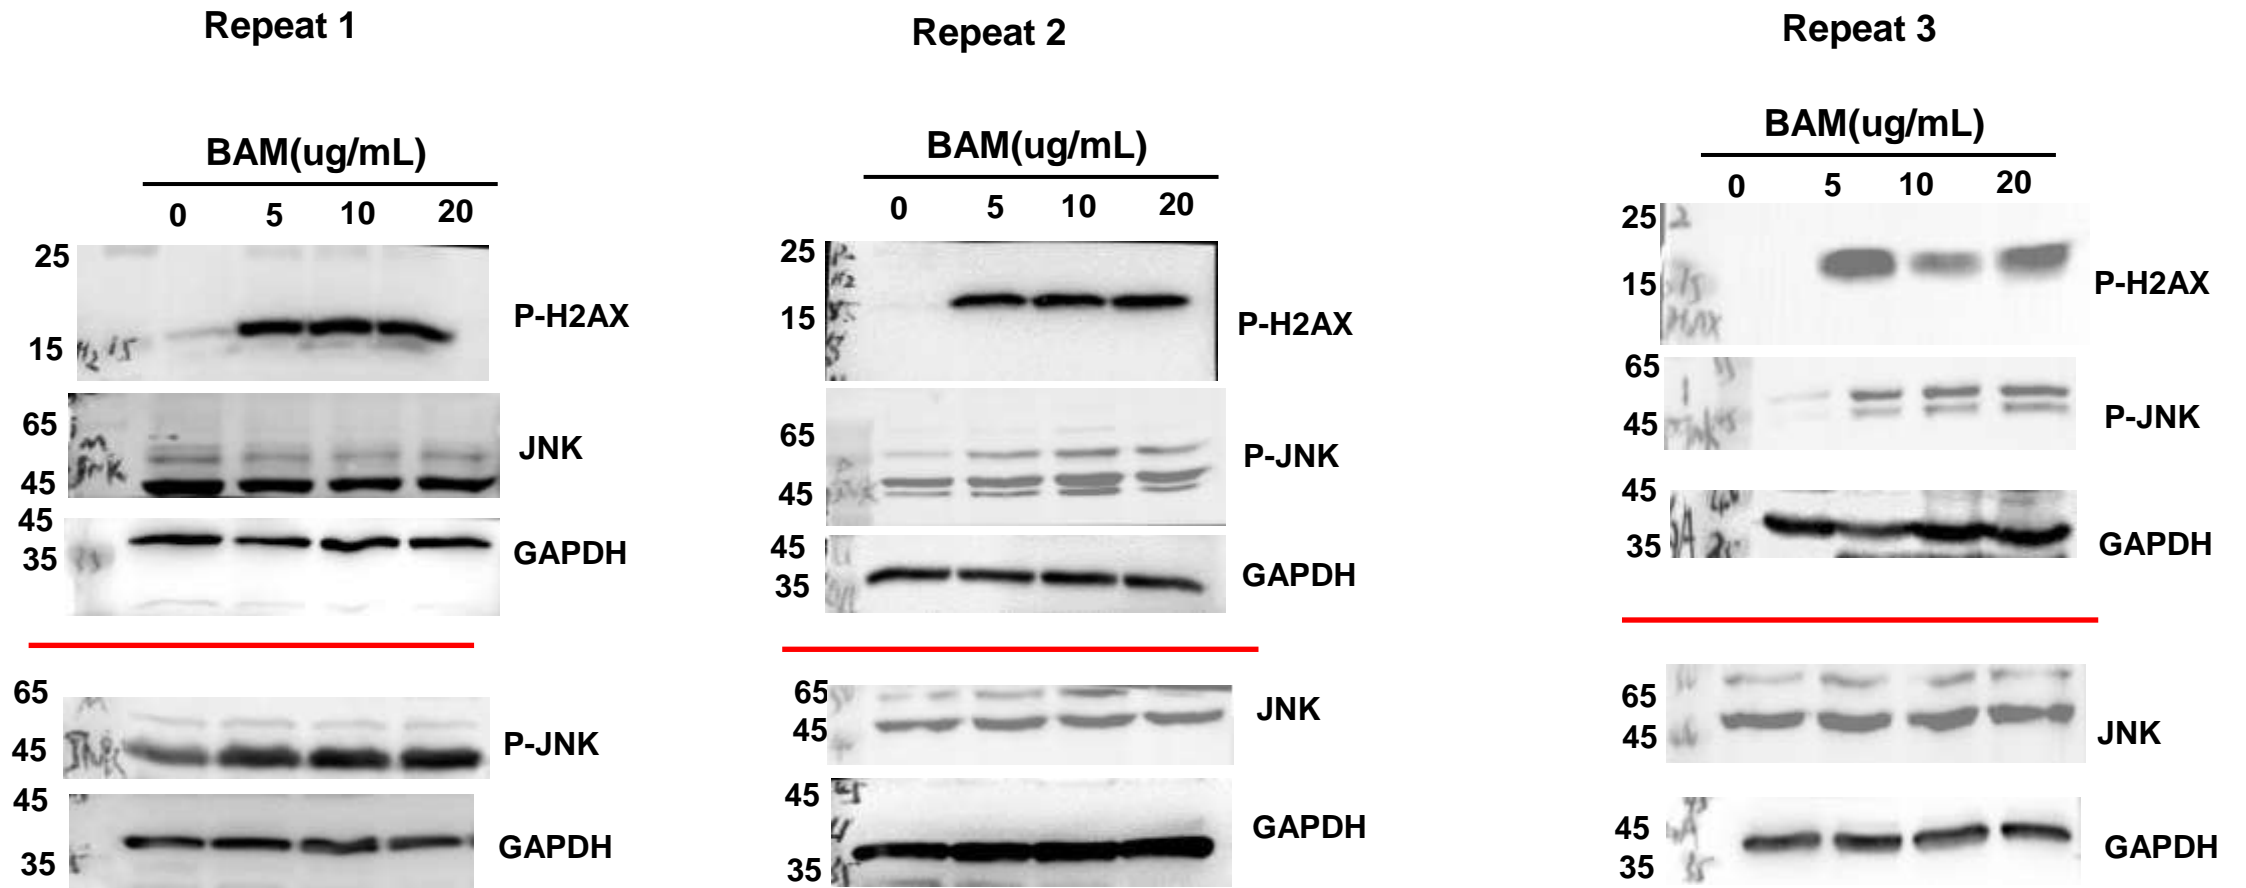

Western blot analysis of P-H2AX, JNK and p-JNK after treating MM.1S cells with boanmycin for 48 hours.

Note: Images above the red line were derived from one gel, images below the red line were derived from another gel.
